# Supplementary material for: Superparamagnetic nanoparticles as potential drug delivery systems for the treatment of Duchenne muscular dystrophy
Source: Royal Society of Chemistry journal article supplement (doi:10.1039/d4nr03407d), 2024-12-19
Supplement: d4nr03407d1.pdf [file d4nr03407d1.pdf]

## **Superparamagnetic nanoparticles as potential *drug delivery* for the treatment of Duchenne Muscular Dystrophy**

Maria L Schumacher<sup>a</sup>, Tatiane N Britos<sup>a</sup>, Fernando L A Fonseca<sup>b</sup>, Fabio F Ferreira<sup>c,d</sup>, David Feder<sup>b</sup>, Paula Fratini<sup>b</sup>, Giuliana Petri<sup>b</sup>, Paula S Haddad<sup>a\*</sup>

<sup>a</sup> Department of Chemistry, Federal University of São Paulo (UNIFESP), Diadema, SP, Brazil

<sup>b</sup> Faculty of Medicine of ABC (FMABC), Santo André, SP, Brazil

<sup>c</sup> Center for Natural and Human Science (CCNH), Federal University of ABC (UFABC), Santo André, SP, Brazil

<sup>d</sup> Nanomedicine Research Unit (NANOMED), Federal University of ABC (UFABC), Santo André, SP, Brazil

\*Corresponding author: Paula S. Haddad

[haddad.paula@unifesp.br](mailto:haddad.paula@unifesp.br)

**Supporting information**

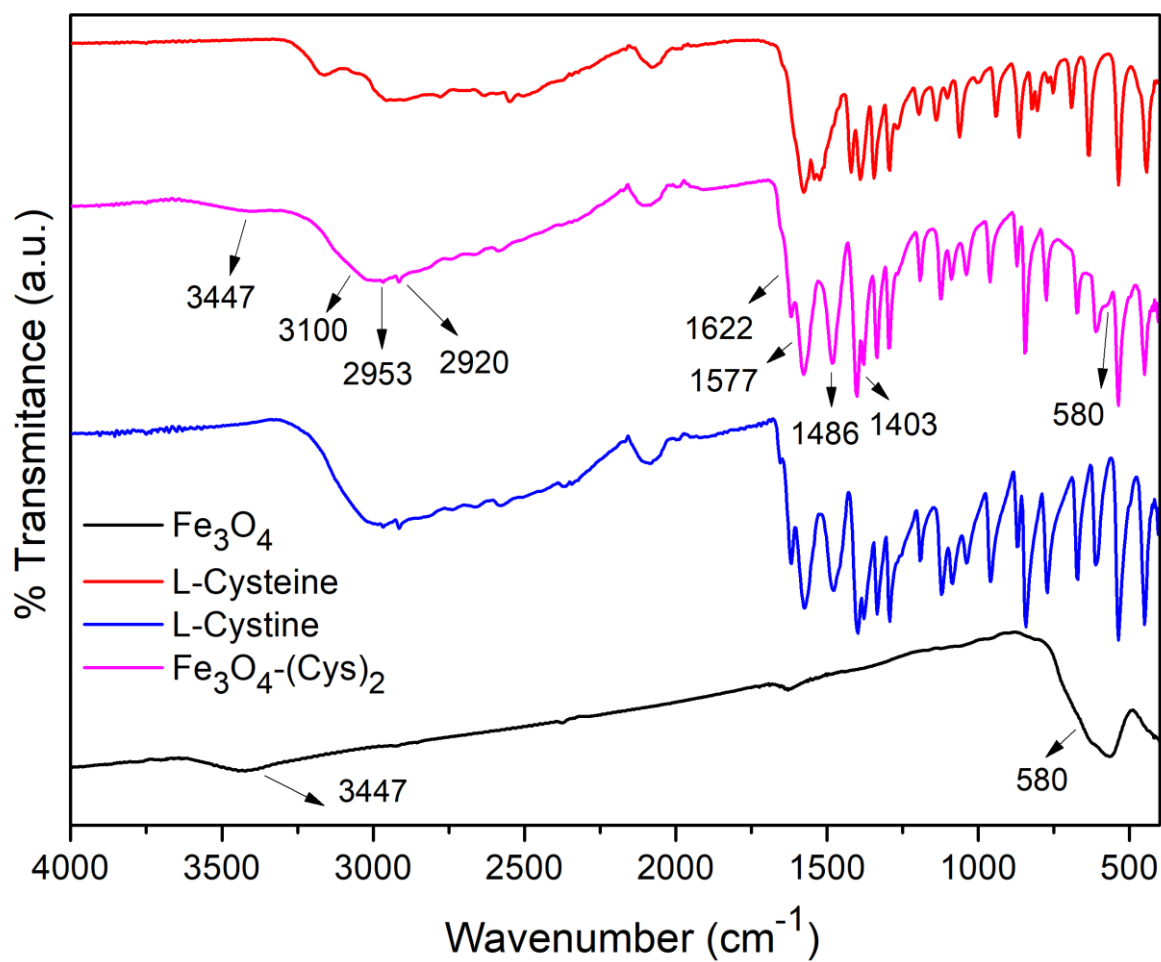

Figure S1: FTIR spectra of  $\text{Fe}_3\text{O}_4$  nanoparticles (black line), L-Cysteine (red line), L-Cystine (blue line) and  $\text{Fe}_3\text{O}_4-(\text{Cys})_2$  (magenta line)
